# Supplementary material for: Vibrational manifestations of strong non-Condon effects in the H3O+·X3 (X = Ar, N2, CH4, H2O) complexes: A possible explanation for the intensity in the “association band” in the vibrational spectrum of water
Source: Royal Society of Chemistry journal article supplement (doi:10.1039/c2cp24110b), 2012-01-01
Supplement: c2cp24110b.pdf [file c2cp24110b.pdf]

## SUPPORTING MATERIALS

### Vibrational manifestations of strong non-Condon effects in the $\text{H}_3\text{O}^+\cdot\text{X}_3$ ( $\text{X}=\text{Ar}, \text{N}_2, \text{CH}_4, \text{H}_2\text{O}$ ) complexes: Microscopic analogues of the “association band” in the vibrational spectrum of water?

Anne B. McCoy,<sup>1,\*</sup> Timothy L. Guasco,<sup>2</sup> Christopher M. Leavitt,<sup>2</sup> Solveig G. Olesen,<sup>3</sup> and Mark A. Johnson<sup>2,\*</sup>

1. Department of Chemistry, The Ohio State University, Columbus, Ohio 43210 USA

2. Sterling Chemistry Laboratory Department of Chemistry, Yale University, P.O. Box 208107, New Haven, Connecticut 06520 USA

3. Department of Chemistry, University of Copenhagen, Universitetsparken 5, DK-2100 Copenhagen, Denmark

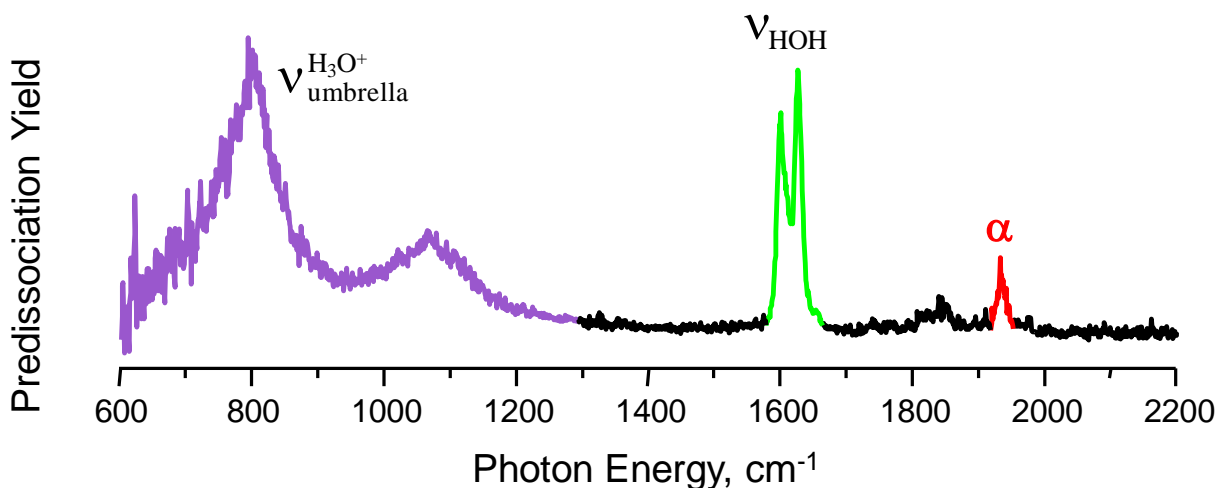

**Figure S1:** Ar predissociation spectrum of  $\text{H}_3\text{O}^+\cdot\text{Ar}_4$  collected over the 600-2200  $\text{cm}^{-1}$  range. The spectrum was collected by monitoring the loss of a single Ar atom as a function of wavelength.

\* Email: mccoym@chemistry.ohio-state.edu; mark.johnson@yale.edu
